# Supplementary material for: Expression of Zyxin in Non-Small Cell Lung Cancer—A Preliminary Study
Source: MDPI journal article supplement (doi:10.3390/biom12060827), 2022-06-13
Supplement: s1 [file s1]

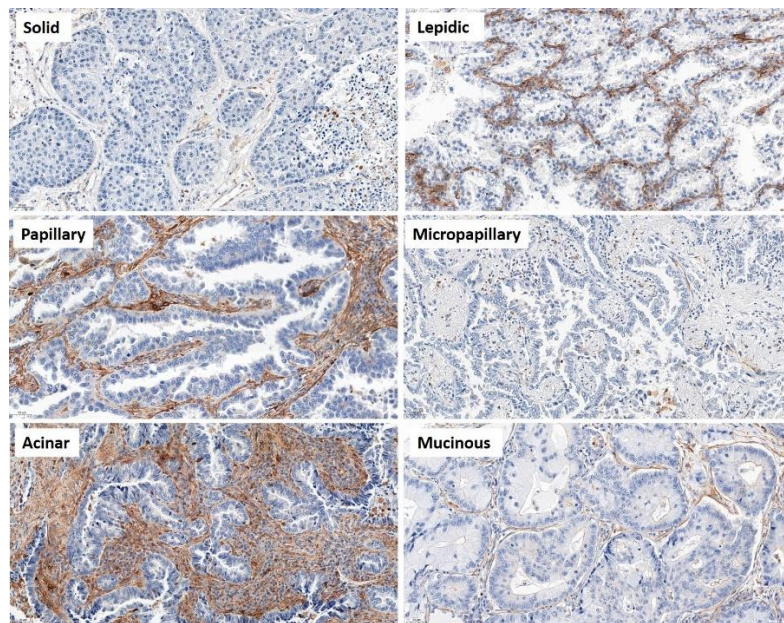

Supplementary Figure 1. Representative IHC images of ZYX expression in different subtypes of lung adenocarcinoma. Magnification x200.
